# Supplementary material for: CK2 targeted RNAi therapeutic delivered via malignant cell-directed tenfibgen nanocapsule: dose and molecular mechanisms of response in xenograft prostate tumors
Source: PubMed Central journal article supplement (PMC5308691; doi:10.18632/oncotarget.11442), 2016-08-20
Supplement: oncotarget-07-61789-s001.pdf [file oncotarget-07-61789-s001.pdf]

## CK2 targeted RNAi therapeutic delivered via malignant cell-directed tenfibgen nanocapsule: dose and molecular mechanisms of response in xenograft prostate tumors

### Supplementary Materials

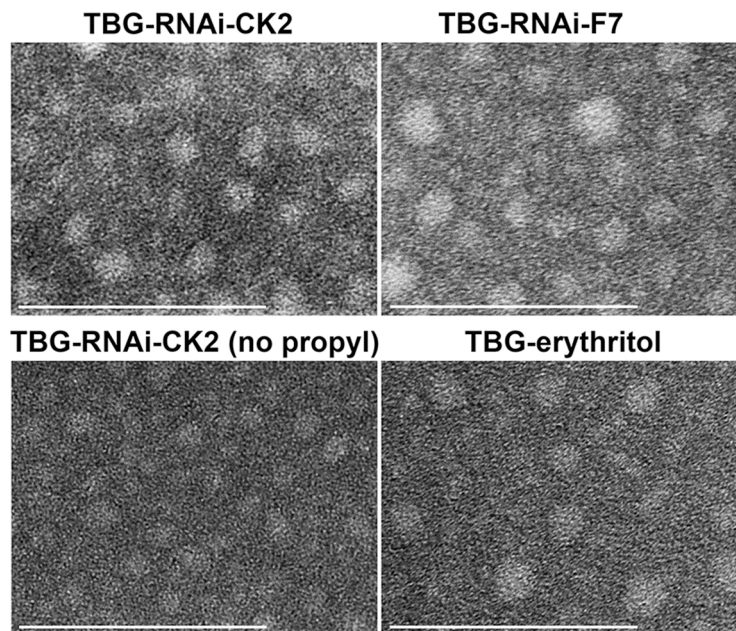

**Supplementary Figure S1: Nanocapsule morphology.** Transmission electron micrographs of TBG-RNAi-CK2, TBG-RNAi-F7, TBG-RNAi-CK2-no propyl, and TBG-erythritol nanocapsules used for different *in vivo* studies. Scale bar represents 100 nm. Original magnification 80,000.

**Supplementary Table S1: TBG nanocapsule characteristics and information**

| Cargo                | Particle Size (nm) <sup>a</sup> | Zeta Potential (meV) <sup>b</sup> | Morphology <sup>c</sup>  | Sequence <sup>d</sup>                |
|----------------------|---------------------------------|-----------------------------------|--------------------------|--------------------------------------|
| RNAi-CK2             | 20.5 ± 2.1                      | -1.19 ± 1.05                      | Uniform, Single Capsules | 5'ATACAACCCAAACT<br>ccacau(propyl)3' |
| RNAi-CK2 (no propyl) | 18.9 ± 1.7                      | -12.25 ± 7.4                      | Uniform, Single Capsules | 5'ATACAACCCAAA<br>CTccacau3'         |
| RNAi-F7              | 21.9 ± 2.3                      | 1.49 ± 0.99                       | Uniform, Single Capsules | 5'GUAAGACTTGAG<br>Augaucc(propyl)3'  |
| Erythritol           | 22.8 ± 1.9                      | 1.07 ± 0.67                       | Uniform, Single Capsules | N/A                                  |

<sup>a</sup>Mean ± SD of the average elliptical diameter determined from TEM micrographs measuring at least 15 nanocapsules.

<sup>b</sup>Average surface charge measured by dynamic light scattering across a 20 volt potential in 1 mM KCl at 2 µg/ml. Data shown is the mean ± SD of 3 independent measurements.

<sup>c</sup>Morphology of all nanocapsules determined by visual AFM and TEM observation.

<sup>d</sup>Sense strand sequence. Upper case letters represent phosphodiester DNA chemistry; small case letters represent 2' O-methyl RNA chemistry.
